# Supplementary material for: A reduced-dimensional polar hybrid perovskite for self-powered broad-spectrum photodetection
Source: Royal Society of Chemistry journal article supplement (doi:10.1039/d0sc06112c), 2021-01-01
Supplement: d0sc06112c1.pdf [file d0sc06112c1.pdf]

# Supporting Information

## Reduced-dimensional polar hybrid perovskite for self-powered broad-spectrum photodetection

Dong Li,<sup>[a, b]</sup> Wentao Wu,<sup>[a, b]</sup> Shiguo Han,<sup>[a, b, c]</sup> Xitao Liu,<sup>[a, b, c]</sup> Yu Peng,<sup>[a, b]</sup> Xiaoqi Li,<sup>[a, b]</sup> Lina Li,<sup>\*[a, b, c]</sup> Maochun Hong,<sup>[a, b, c]</sup> Junhua Luo<sup>[a, b, c]</sup>

[a] State Key Laboratory of Structural Chemistry, Fujian Institute of Research on the Structure of Matter, Chinese Academy of Sciences, Fuzhou, Fujian 350002, China

[b] Fujian Science & Technology Innovation Laboratory for Optoelectronic Information of China, Fuzhou, Fujian 350108, P. R. China

[c] University of Chinese Academy of Sciences, Beijing, 100049, China

\*To whom correspondence should be addressed.

[lilina@fjirsm.ac.cn](mailto:lilina@fjirsm.ac.cn)

## Experimental Section

**Materials:** Pb(Ac)<sub>2</sub> (99%, Aladdin), methylamine (MA, 29%, Aladdin), hydroiodic acid (HI, 48%, Aladdin), Aminobutanol (99%, Aladdin). All the chemicals were bought and used without further purification.

**Synthesis.** Pb(Ac)<sub>2</sub> (2.27 g, 6 mmol) was dissolved in 48% aqueous HI solution (15 mL) by heating to boil under constant magnetic stirring to give a yellowish solution. Subsequent addition of Aminobutanol (0.36 g, 4 mmol) and MA (0.45 g, 4 mmol) to the hot solution formed yellowish precipitation, which were dissolved under stirring to afford a red solution. Finally, dark-red crystals were obtained after the solution cooling to room temperature.

**Powder X-ray diffraction.** Powder X-ray diffractions (PXRD) were performed on a Rigaku MiniFlex 600 diffractometer at room temperature. The diffraction patterns were collected in the 2 $\theta$  range of 5°–50° with a step size of 0.5 °/min. The experimental PXRD patterns match fairly well with the simulated data based on the single-crystal structure, which confirm the pure phase of **IMP**.

**Second harmonic generation (SHG) measurement.** SHG experiments of **IMP** were performed on powder samples using the fundamental laser beam with a low divergence (pulsed Nd:YAG at a wavelength of 1064 nm, 5 ns pulse duration, 1.6 MW peak power, 10 Hz repetition rate). The numerical values of the nonlinear optical coefficients for SHG have been determined by comparison with a KH<sub>2</sub>PO<sub>4</sub> reference.

**Single-crystal structure determination.** Single-crystal X-ray diffractions for **IMP** were performed on a BRUKER D8 with the Mo K $\alpha$  radiation. The data were processed by the Crystalclear software package. The structures of **IMP** were solved by direct methods and then refined by the full-matrix least-squares refinements on F<sup>2</sup> using SHELXLTL software package. All the non-hydrogen atoms were located from the trial structure and refined anisotropically with SHELXTL using the full-matrix least-squares procedure.

**Optical property measurements.** The UV absorptions in solid state were measured at room temperature on a PE Lambda 900 UV-Visible spectrophotometer.

**Detector performance measurement.** The current-voltage and current-time curves were measured using KEITHLEY in an electromagnetically shielded probe station. The light was generated from LEDs with wavelength of 405 nm, 520 nm, 637 nm (THORLABS, ITC4001).

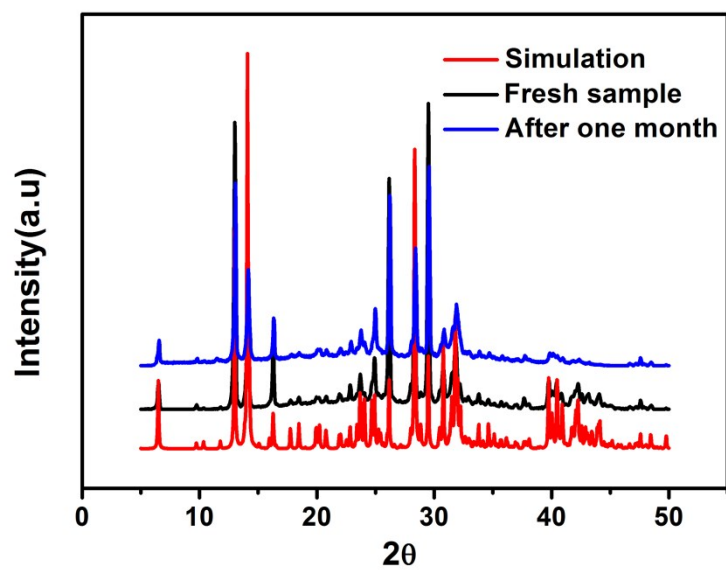

**Figure S1.** X-ray diffraction patterns for **IMP**

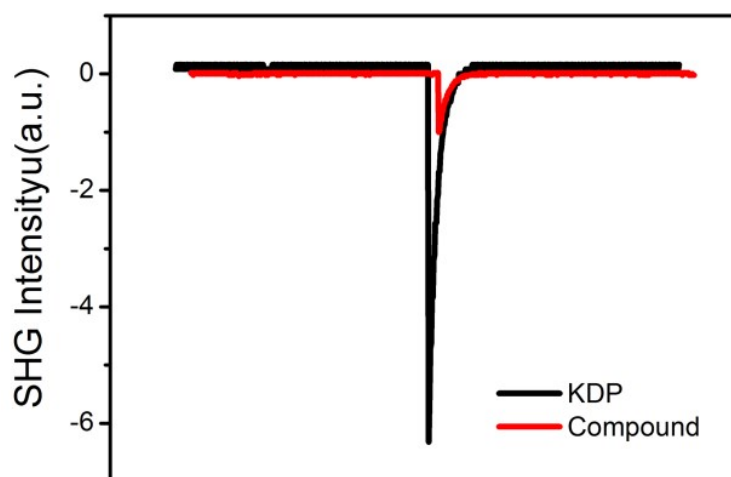

**Figure S2.** The SHG signals for the KDP standard and polycrystalline sample of **IMP** at room temperature.

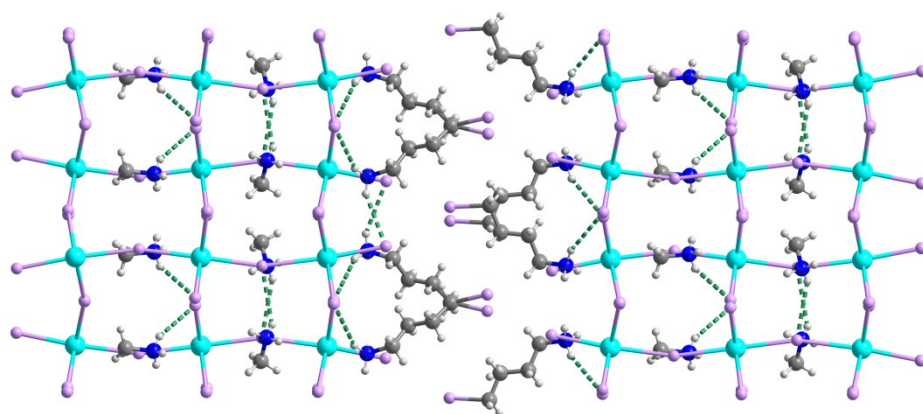

**Figure S3.** Hydrogen bonds in the compound **IMP** (In order to clearly express the hydrogen bond, some hydrogen atoms are removed).

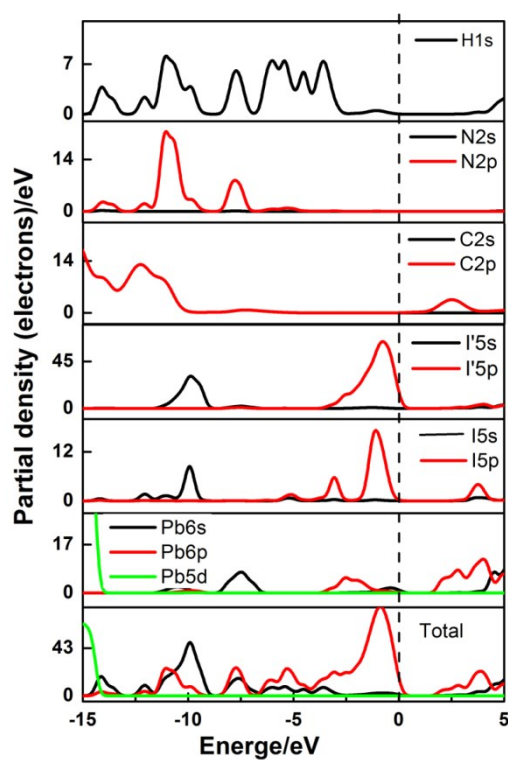

**Figure S4.** Partial density of states of **IMP**.

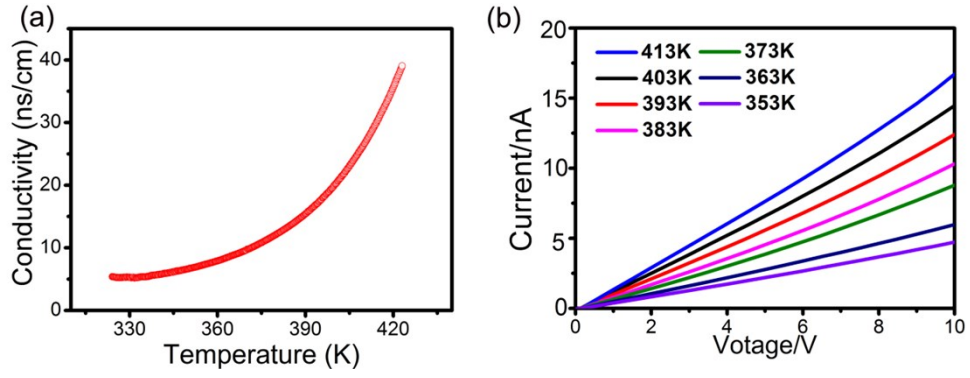

**Figure S5.** (a) Temperature-dependent conductivity. (b) The current-voltage ( $I$ - $V$ ) measurement at various temperatures.

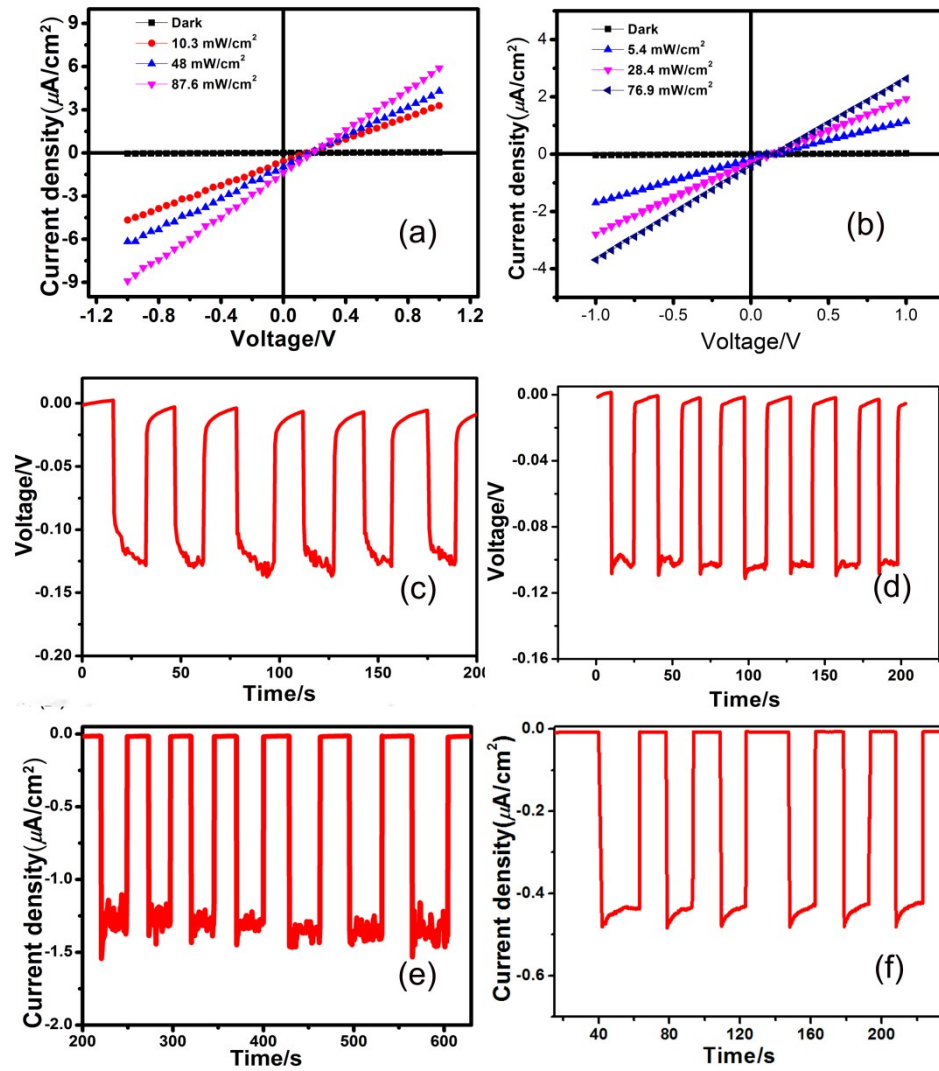

**Figure S6.** (a, b)  $I$ - $V$  characteristics along  $c$ -axis of IMP at 520 and 405 nm laser, respectively. (c, d) Reproducible bulk photovoltaic on/off switches of 520 and 405 nm laser. (e, f) Reproducible photocurrent on/off switches of 520 and 405 nm laser at zero bias.

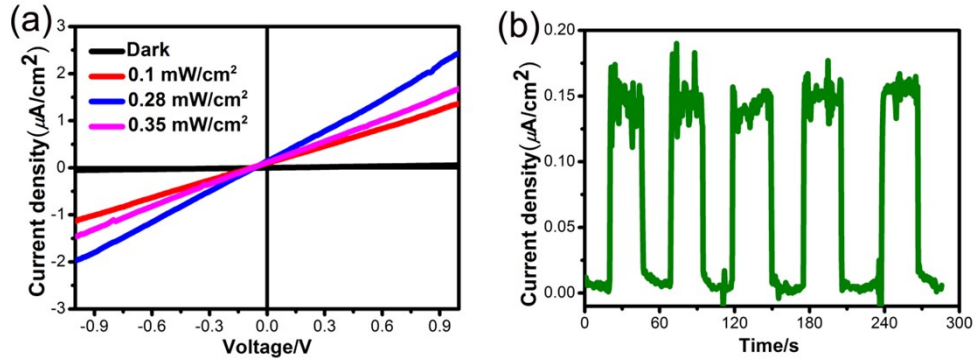

**Figure S7.** (a)  $I$ - $V$  characteristics along  $c$ -axis for IMP at 700 nm. (b) Reproducible photocurrent on/off switches of 700 nm.

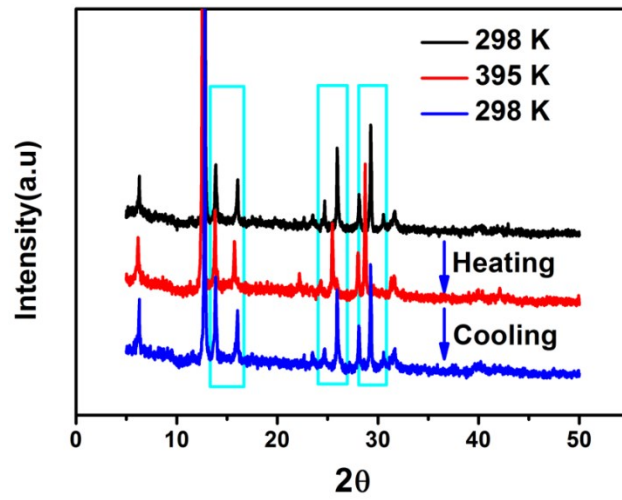

**Figure S8.** PXRD at different temperatures with some changes labelled.

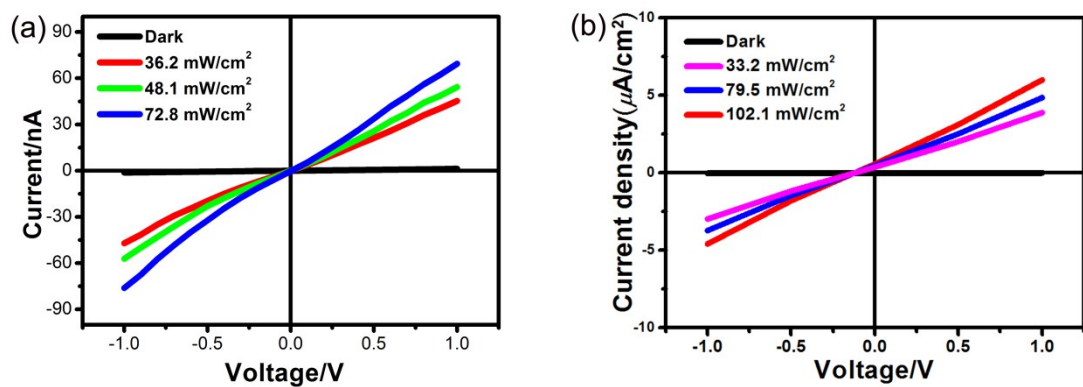

**Figure S9.** (a)  $I$ - $V$  characteristics for  $b$ -axis of IMP with different incident powers. (b)  $I$ - $V$  characteristics for  $a$ -axis of IMP with different incident powers (637 nm laser).

**Table S1.** Crystal data for **IMP**

| Temperature (K)                                     | 290 K                                                                          | 385 K                                                                          |
|-----------------------------------------------------|--------------------------------------------------------------------------------|--------------------------------------------------------------------------------|
| Empirical formula                                   | C <sub>10</sub> H <sub>34</sub> I <sub>12</sub> N <sub>4</sub> Pb <sub>3</sub> | C <sub>10</sub> H <sub>34</sub> I <sub>12</sub> N <sub>4</sub> Pb <sub>3</sub> |
| Formula weight                                      | 2354.78                                                                        | 2354.78                                                                        |
| Temperature/K                                       | 290.0                                                                          | 385.0                                                                          |
| Crystal system                                      | monoclinic                                                                     | monoclinic                                                                     |
| Space group                                         | <i>Pc</i>                                                                      | <i>C2/m</i>                                                                    |
| <i>a</i> /Å                                         | 27.3848 (12)                                                                   | 8.909 (2)                                                                      |
| <i>b</i> /Å                                         | 9.0015 (4)                                                                     | 9.012 (3)                                                                      |
| <i>c</i> /Å                                         | 8.8216 (3)                                                                     | 27.896 (8)                                                                     |
| $\alpha$ /°                                         | 90                                                                             | 90                                                                             |
| $\beta$ /°                                          | 95.9990 (10)                                                                   | 92.832 (10)                                                                    |
| $\gamma$ /°                                         | 90                                                                             | 90                                                                             |
| Volume/Å <sup>3</sup>                               | 2162.65 (15)                                                                   | 2237.1 (11)                                                                    |
| <i>Z</i>                                            | 2                                                                              | 2                                                                              |
| $\rho$ calc/g/cm <sup>3</sup>                       | 3.616                                                                          | 3.496                                                                          |
| $\mu$ /mm <sup>-1</sup>                             | 20.223                                                                         | 19.550                                                                         |
| <i>F</i> (000)                                      | 2008.0                                                                         | 2008.0                                                                         |
| Radiation                                           | Mo K $\alpha$ ( $\lambda$ = 0.71073)                                           | Mo K $\alpha$ ( $\lambda$ = 0.71073)                                           |
| Theta range (°)                                     | 4.486 to 52.84                                                                 | 4.386 to 49.982                                                                |
| Index ranges                                        | -33 ≤ <i>h</i> ≤ 34, -11 ≤ <i>k</i> ≤ 11, -11 ≤ <i>l</i> ≤ 9                   | -10 ≤ <i>h</i> ≤ 9, -10 ≤ <i>k</i> ≤ 10, -33 ≤ <i>l</i> ≤ 33                   |
| Reflections collected                               | 36105                                                                          | 17421                                                                          |
| Independent reflections                             | 8192 [ <i>R</i> <sub>int</sub> = 0.0546, <i>R</i> <sub>sigma</sub> = 0.0520]   | 2111 [ <i>R</i> <sub>int</sub> = 0.0814, <i>R</i> <sub>sigma</sub> = 0.0495]   |
| Data/restraints/parameters                          | 8192/102/269                                                                   | 2111/62/98                                                                     |
| GOF                                                 | 1.038                                                                          | 1.068                                                                          |
| Final <i>R</i> indexes [ <i>I</i> ≥ 2σ( <i>I</i> )] | <i>R</i> <sub>1</sub> = 0.0627,<br><i>wR</i> <sub>2</sub> = 0.1686             | <i>R</i> <sub>1</sub> = 0.0948,<br><i>wR</i> <sub>2</sub> = 0.2620             |
| Final <i>R</i> indexes [all data]                   | <i>R</i> <sub>1</sub> = 0.0783,<br><i>wR</i> <sub>2</sub> = 0.1832             | <i>R</i> <sub>1</sub> = 0.1099,<br><i>wR</i> <sub>2</sub> = 0.2731             |

**Table S2.** Bond angles for **IMP**.

| Bond                                             | Angle      | Bond                                             | Angle      |
|--------------------------------------------------|------------|--------------------------------------------------|------------|
| I(1)-Pb(1)-I(3) <sup>[#1]</sup>                  | 87.32 (3)  | I(5) <sup>[#3]</sup> -Pb(2)-I(6) <sup>[#4]</sup> | 88.97(4)   |
| I(1)-Pb(1)-I(3)                                  | 93.07(3)   | I(5)-Pb(2)-I(6)                                  | 94.33(4)   |
| I(1)-Pb(1)-I(2)                                  | 94.06(3)   | I(6)-Pb(2)-I(4)                                  | 90.53(5)   |
| I(1)-Pb(1)-I(2) <sup>[#2]</sup>                  | 88.97(3)   | I(6)-Pb(2)-I(5) <sup>[#3]</sup>                  | 177.22(4)  |
| I(1)-Pb(1)-I(4)                                  | 173.45(3)  | I(6)-Pb(2)-I(6) <sup>[#4]</sup>                  | 88.305(18) |
| I(3) <sup>[#1]</sup> -Pb(1)-I(3)                 | 87.789(11) | I(10)-Pb(3)-I(9)                                 | 93.79(3)   |
| I(3) <sup>[#1]</sup> -Pb(1)-I(2) <sup>[#2]</sup> | 94.89(3)   | I(10)-Pb(3)-I(9) <sup>[#4]</sup>                 | 89.85(3)   |

|                                  |            |                                                  |            |
|----------------------------------|------------|--------------------------------------------------|------------|
| I(3) <sup>[#1]</sup> -Pb(1)-I(2) | 176.96(3)  | I(10)-Pb(3)-I(7)                                 | 174.65(3)  |
| I(3)-Pb(1)-I(4)                  | 87.26(3)   | I(10)-Pb(3)-I(8) <sup>[#3]</sup>                 | 87.56(3)   |
| I(3) <sup>[#1]</sup> -Pb(1)-I(4) | 86.16(3)   | I(10)-Pb(3)-I(8)                                 | 92.56(3)   |
| I(2) <sup>[#2]</sup> -Pb(1)-I(3) | 176.71(3)  | I(9)-Pb(3)-I(9) <sup>[#4]</sup>                  | 87.998(11) |
| I(2)-Pb(1)-I(3)                  | 89.43(3)   | I(9) <sup>[#4]</sup> -Pb(3)-I(7)                 | 90.68(3)   |
| I(2) <sup>[#2]</sup> -Pb(1)-I(2) | 87.844(11) | I(9)-Pb(3)-I(7)                                  | 91.54(3)   |
| I(2)-Pb(1)-I(4)                  | 92.48(4)   | I(9)-Pb(3)-I(8) <sup>[#3]</sup>                  | 176.54(3)  |
| I(2) <sup>[#2]</sup> -Pb(1)-I(4) | 91.01(4)   | I(9) <sup>[#4]</sup> -Pb(3)-I(8) <sup>[#3]</sup> | 95.19(2)   |
| I(7)-Pb(2)-I(4)                  | 179.41(5)  | I(8)-Pb(3)-I(9) <sup>[#4]</sup>                  | 176.13(3)  |
| I(7)-Pb(2)-I(5) <sup>[#3]</sup>  | □ 89.91(4) | I(8)-Pb(3)-I(9)                                  | 88.82(2)   |
| I(7)-Pb(2)-I(5)                  | 89.98(4)   | I(8) <sup>[#3]</sup> -Pb(3)-I(7)                 | 87.09(3)   |
| I(7)-Pb(2)-I(6)                  | 89.52(5)   | I(8)-Pb(3)-I(7)                                  | 87.20(3)   |
| I(7)-Pb(2)-I(6) <sup>[#4]</sup>  | 89.90(5)   | I(8)-Pb(3)-I(8) <sup>[#3]</sup>                  | 87.939(11) |
| I(4)-Pb(2)-I(6) <sup>[#4]</sup>  | 89.51(5)   | Pb(1) <sup>[#4]</sup> -I(3)-Pb(1)                | 163.00(4)  |
| I(5)-Pb(2)-I(4)                  | 90.60(4)   | Pb(3)-I(9)-Pb(3) <sup>[#1]</sup>                 | 166.78(5)  |
| I(5) <sup>[#3]</sup> -Pb(2)-I(4) | 90.01(4)   | Pb(2)-I(7)-Pb(3)                                 | 165.10(5)  |
| I(5)-Pb(2)-I(5) <sup>[#3]</sup>  | 88.392(18) | Pb(3)-I(8)-Pb(3) <sup>[#2]</sup>                 | 163.66(5)  |
| I(5)-Pb(2)-I(6) <sup>[#4]</sup>  | 177.36(4)  | Pb(1) <sup>[#3]</sup> -I(2)-Pb(1)                | 164.78(5)  |
| Pb(2)-I(4)-Pb(1)                 | 165.45(6)  | Pb(2)-I(5)-Pb(2) <sup>[#2]</sup>                 | 167.92(6)  |
| Pb(2)-I(6)-Pb(2) <sup>[#1]</sup> | 165.37(6)  |                                                  |            |

[#1] = +X, 1-Y, 1/2+Z; [#2] = +X, 2-Y, 1/2+Z; [#3] = +X, 2-Y, -1/2+Z; [#4] = +X, 1-Y, -1/2+Z.

**Table S3.** Bond lengths for **IMP**.

| Bond                       | (Å)        | Bond                       | (Å)        | Bond                        | (Å)        |
|----------------------------|------------|----------------------------|------------|-----------------------------|------------|
| Pb(1)-I(1)                 | 3.0634(10) | Pb(2)-I(5) <sup>[#3]</sup> | 3.1746(13) | Pb(3)-I(8) <sup>[#3]</sup>  | 3.2019(9)  |
| Pb(1)-I(3) <sup>[#1]</sup> | 3.1668(10) | Pb(2)-I(5)                 | 3.1592(13) | Pb(3)-I(8)                  | 3.1541(10) |
| Pb(1)-I(3)                 | 3.1952(10) | Pb(2)-I(6) <sup>[#4]</sup> | 3.1867(14) | I(3)-Pb (1) <sup>[#4]</sup> | 3.1668(10) |
| Pb(1)-I(2)                 | 3.1924(11) | Pb(2)-I(6)                 | 3.1968(14) | I(9)-Pb(3) <sup>[#1]</sup>  | 3.1905(10) |
| Pb(1)-I(2) <sup>[#2]</sup> | 3.1749(11) | Pb(3)-I(10)                | 3.0490(10) | I(8)-Pb(3) <sup>[#2]</sup>  | 3.2019(9)  |
| Pb(1)-I(4)                 | 3.2623(11) | Pb(3)-I(9)                 | 3.1639(9)  | I(2)-Pb (1) <sup>[#3]</sup> | 3.1749(11) |
| Pb(2)-I(7)                 | 3.1434(14) | Pb(3)-I(9) <sup>[#4]</sup> | 3.1904(10) | I(5)-Pb (2) <sup>[#2]</sup> | 3.1747(13) |
| Pb(2)-I(4)                 | 3.1780(14) | Pb(3)-I(7)                 | 3.3334(10) | I(6)-Pb (2) <sup>[#1]</sup> | 3.1867(14) |

[#1] = +X, 1-Y, 1/2+Z; [#2] = +X, 2-Y, 1/2+Z; [#3] = +X, 2-Y, -1/2+Z; [#4] = +X, 1-Y, -1/2+Z.



Calculation of polarization of **IMP** according to a point charge model:

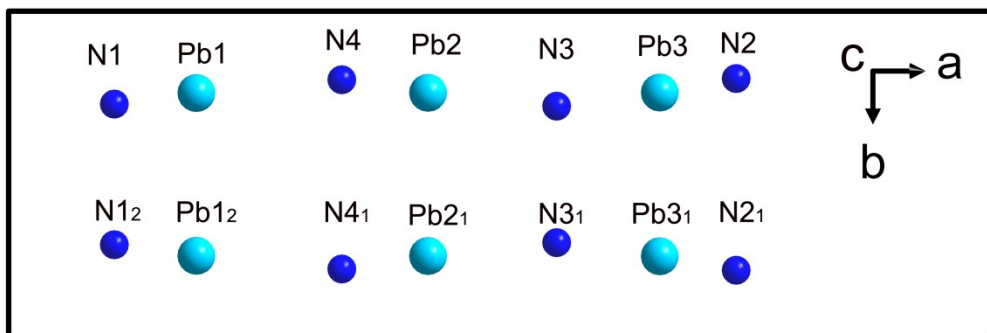

**Figure S10.** Point-charge model for calculating the polarization of **IMP** at 290 K. Hydrogen atoms are omitted for clarity.

Atom coordinates for cell of **IMP** (290 K).

| Atoms | Atoms coordinate                                                                                                              |                                                                                                                                                            | Coordinate of charge center |
|-------|-------------------------------------------------------------------------------------------------------------------------------|------------------------------------------------------------------------------------------------------------------------------------------------------------|-----------------------------|
| Pb    | Pb1(0.19055, 0.25067, 0.95588)<br>Pb2 (0.42572, 0.24994, 0.03430)<br>Pb3 (0.66095, 0.24915, 0.11329)                          | Pb1 <sub>2</sub> (0.19055, 0.74933, 0.45588)<br>Pb2 <sub>1</sub> (0.42572, 0.75006, 0.53430)<br>Pb3 <sub>1</sub> (0.66095, 0.75085, 0.61329)               | (0.42574, 0.5, 0.45115)     |
| N     | N1 (0.1073, 0.28448, 0.3671)<br>N2 (0.73853, 0.2063, 0.6413)<br>N3 (0.55627, 0.29089, 0.538)<br>N4 (0.33825, 0.21002, 0.5366) | N1 <sub>2</sub> (0.1073, 0.71552, 0.8671)<br>N2 <sub>1</sub> (0.73853, 0.7937, 0.1413)<br>N b2 (0.55627, 0.70911, 0.038)<br>N b4(0.33825, 0.77899, 0.0366) | (0.43509, 0.5, 0.39575)     |

$$\begin{aligned}
 P_{s \text{ } a\text{-axis}} &= [(-e \times 0.42574) \times 6 \times 4/3 + (e \times 0.43509) \times 8] \times a / V \\
 &= [0.0748 \times 1.6 \times 10^{-19} \times 27.3848 \times 10^{-10} \text{ C m}]/V \\
 &= 3.28 \times 10^{-29} \text{ C m} / (2162.65 \times 10^{-30} \text{ m}^3) \\
 &= 1.51 \times 10^{-2} \text{ C m}^{-2} \\
 |P_s| &= 1.51 \times 10^{-2} \text{ C m}^{-2} = 1.51 \mu\text{C cm}^2
 \end{aligned}$$

$$\begin{aligned}
 P_{s \text{ } c\text{-axis}} &= [(-e \times 0.45115) \times 8 + (e \times 0.39557) \times 8] \times c / V \\
 &= [0.5558 \times 1.6 \times 10^{-19} \times 8.8216 \times 10^{-10} \text{ C m}]/V \\
 &= 7.84 \times 10^{-29} \text{ C m} / (2162.65 \times 10^{-30} \text{ m}^3) \\
 &= 3.62 \times 10^{-2} \text{ C m}^{-2} \\
 |P_s| &= 3.62 \times 10^{-2} \text{ C m}^{-2} = 3.62 \mu\text{C cm}^2
 \end{aligned}$$
